# Supplementary material
Source: publisher figshare collection journal article supplement (https://gsapubs.figshare.com/ndownloader/files/23300537)
Supplement: Supplementary file 1 [file 23300537]

## Sheet: trace metal
Bass River
top (ft)	bottom (ft)	avg (ft)	avg (m)	Species	Mg/Ca (mmol/mol)	B/Ca (µmol/mol)		top (ft)	bottom (ft)	avg (ft)	avg (m)	Species	Mg/Ca (mmol/mol)	B/Ca (µmol/mol)		top (ft)	bottom (ft)	avg (ft)	avg (m)	Species	Mg/Ca (mmol/mol)	B/Ca (µmol/mol)
1145	1145.1	1145.05	349.01	Subbotina	3.2	40.5		1146	1146.1	1146.05	349.32	A.soldadoensis	2.84	47.83		1145	1145.1	1145.05	349.01	Morozovella	3.5	39.79
1147	1147.1	1147.05	349.62	Subbotina	3.11	43		1149.1	1149.2	1149.15	350.26	A.soldadoensis	3.02	43.26		1146	1146.1	1146.05	349.32	Morozovella	3.61	46.95
1148.3	1148.4	1148.35	350.02	Subbotina	3.46	42.03		1152	1152.1	1152.05	351.14	A.soldadoensis		51.18		1147	1147.1	1147.05	349.62	Morozovella	3.95	49.15
1149.1	1149.2	1149.15	350.26	Subbotina	3.53	42.52		1154	1154.1	1154.05	351.75	A.soldadoensis		50.27		1148.3	1148.4	1148.35	350.02	Morozovella	3.55	41.71
1152	1152.1	1152.05	351.14	Subbotina	3.93	43.34		1159	1159.1	1159.05	353.28	A.soldadoensis		43.88		1149.1	1149.2	1149.15	350.26	Morozovella	3.84	44.35
1154	1154.1	1154.05	351.75	Subbotina	4.04	42.83		1165	1165.1	1165.05	355.11	A.soldadoensis	3.98	43.04		1152	1152.1	1152.05	351.14	Morozovella		48.29
1157	1157.1	1157.05	352.67	Subbotina		39.8		1167	1167.1	1167.05	355.72	A.soldadoensis	3.57	38.93		1157	1157.1	1157.05	352.67	Morozovella		44.77
1158	1158.1	1158.05	352.97	Subbotina		37.88		1168.6	1168.7	1168.65	356.2	A.soldadoensis	3.16	37.41		1158	1158.1	1158.05	352.97	Morozovella		34.77
1159	1159.1	1159.05	353.28	Subbotina		40.7		1169.1	1169.2	1169.15	356.36	A.soldadoensis	3.31	37.02		1163	1163.1	1163.05	354.5	Morozovella	4.74	43.5
1161	1161.1	1161.05	353.89	Subbotina	3.32	36.86		1169.4	1169.5	1169.45	356.45	A.soldadoensis	3.6	40.86		1163.9	1164	1163.95	354.77	Morozovella	4.25	33.47
1163	1163.1	1163.05	354.5	Subbotina	3.39	38.29		1170	1170.1	1170.05	356.63	A.soldadoensis		43.24		1165	1165.1	1165.05	355.11	Morozovella		43.69
1165	1165.1	1165.05	355.11	Subbotina		39.79		1170.2	1170.3	1170.25	356.69	A.soldadoensis	3.2	40.99		1169.4	1169.5	1169.45	356.45	Morozovella	3.49	40.94
1165	1165.1	1165.05	355.11	Subbotina		38.68		1170.6	1170.7	1170.65	356.81	A.soldadoensis	3.24	37.63		1170	1170.1	1170.05	356.63	Morozovella	4.12	41.91
1167	1167.1	1167.05	355.72	Subbotina	4	38.42		1171.3	1171.4	1171.35	357.03	A.soldadoensis	3.28	41.16		1170.2	1170.3	1170.25	356.69	Morozovella	3.39	44.53
1167	1167.1	1167.05	355.72	Subbotina		37.14		1171.5	1171.6	1171.55	357.09	A.soldadoensis	3.18	36.04		1170.6	1170.7	1170.65	356.81	Morozovella	4.08	43.16
1167.4	1167.5	1167.45	355.84	Subbotina		40.09		1171.6	1171.7	1171.65	357.12	A.soldadoensis	3.32	42.07		1171.3	1171.4	1171.35	357.03	Morozovella	3.74	45.49
1168.6	1168.7	1168.65	356.2	Subbotina	3.24	40.48		1171.8	1171.9	1171.85	357.18	A.soldadoensis	3.3	38.52		1171.5	1171.6	1171.55	357.09	Morozovella	3.46	44.93
1169.1	1169.2	1169.15	355.36	Subbotina	3.41	38.01		1171.9	1172	1171.95	357.21	A.soldadoensis	3.08	45.72		1171.5	1171.6	1171.55	357.09	Morozovella	3.88	48.66
1169.4	1169.5	1169.45	356.45	Subbotina	4.03	38.86		1173.9	1174	1173.95	357.82	A.soldadoensis	2.5	69.22
1170	1170.1	1170.05	356.63	Subbotina		35.87		1176.3	1176.4	1176.35	358.55	A.soldadoensis	2.67	65.4
1170.2	1170.3	1170.25	356.69	Subbotina	3.81	40.11		1177	1177.1	1177.05	358.76	A.soldadoensis	3.09	64.34
1170.6	1170.7	1170.65	356.81	Subbotina	3.68	39		1182.8	1182.9	1182.85	360.53	A.soldadoensis	2.39	59.91
1170.75	1170.85	1170.8	356.86	Subbotina	3.61	49.72		1183	1183.1	1183.05	360.59	A.soldadoensis	2.59	66.43
1171.3	1171.4	1171.35	357.03	Subbotina	3.8	45.95
1171.5	1171.6	1171.55	357.09	Subbotina	4.21	39.38
1172.6	1172.7	1172.65	357.42	Subbotina	2.33	52.56
1172.8	1172.9	1172.85	357.48	Subbotina	2.61	59.71
1173.1	1173.2	1173.15	357.58	Subbotina	2.34	51.08
1173.4	1173.5	1173.45	357.67	Subbotina	2.71	55.41
1173.9	1174	1173.95	357.82	Subbotina	2.51	56.89
1174	1174.1	1174.05	357.85	Subbotina	2.38	56.9
1176.3	1176.4	1176.35	358.55	Subbotina	2.37	55.94
1177	1177.1	1177.05	358.76	Subbotina	2.59	56.72
1178	1178.1	1178.05	359.07	Subbotina	2.55	59.06
1179	1179.1	1179.05	359.37	Subbotina	2.68	54.93
1180.8	1180.9	1180.85	359.92	Subbotina	2.44	65.83
1182.8	1182.9	1182.85	360.53	Subbotina	2.35	58.29
1183	1183.1	1183.05	360.59	Subbotina	2.41	57.73
1184	1184.1	1184.05	360.9	Subbotina	2.45	54.89

## Sheet: stable isotope
Bass River
top (ft)	bottom (ft)	avg (ft)	avg (m)	Species	δ13C (‰) PDB	δ18O (‰) PDB		top (ft)	bottom (ft)	avg (ft)	avg (m)	Species	δ13C (‰) PDB	δ18O (‰) PDB		top (ft)	bottom (ft)	avg (ft)	avg (m)	Species	δ13C (‰) PDB	δ18O (‰) PDB
1145	1145.1	1145.05	349.01	Subbotina	-0.69	-2.38		1149.1	1149.2	1149.15	350.26	A.soldadoensis	0.45	-2.87		1145	1145.1	1145.05	349.01	Morozovella	1.62	-3.12
1147	1147.1	1147.05	349.62	Subbotina	-1.01	-2.42		1161	1161.1	1161.05	353.89	A.soldadoensis	-0.19	-3.16		1147	1147.1	1147.05	349.62	Morozovella	0.92	-3.2
1148.3	1148.4	1148.35	350.02	Subbotina	-0.97	-2.61		1165	1165.1	1165.05	355.11	A.soldadoensis	0.26	-3.14		1148.3	1148.4	1148.35	350.02	Morozovella	0.86	-3.89
1149.1	1149.2	1149.15	350.26	Subbotina	-1.08	-2.42		1167	1167.1	1167.05	355.72	A.soldadoensis	-0.65	-2.93		1157	1157.1	1157.05	352.67	Morozovella	0.68	-3.42
1152	1152.1	1152.05	351.14	Subbotina	-1.27	-2.67		1168.6	1168.7	1168.65	356.2	A.soldadoensis	-0.34	-3.03		1158	1158.1	1158.05	352.97	Morozovella	1.45	-3.62
1154	1154.1	1154.05	351.75	Subbotina	-1.43	-2.88		1169.1	1169.2	1169.15	356.36	A.soldadoensis	-0.59	-3.08		1161	1161.1	1161.05	353.89	Morozovella	0.44	-3.27
1157	1157.1	1157.05	352.67	Subbotina	-1.4	-2.65		1171.5	1171.6	1171.55	357.09	A.soldadoensis	0.01	-3.42		1163	1163.1	1163.05	354.5	Morozovella	0.46	-3.78
1158	1158.1	1158.05	352.97	Subbotina	-1.67	-2.91		1176.3	1176.4	1176.35	358.55	A.soldadoensis	3.62	-2.5		1165	1165.1	1165.05	355.11	Morozovella	0.36	-3.15
1159	1159.1	1159.05	353.28	Subbotina	-1.75	-2.79		1177	1177.1	1177.05	358.76	A.soldadoensis	2.76	-2.93
1163	1163.1	1163.05	354.5	Subbotina	-1.53	-2.86		1183	1183.1	1183.05	360.56	A.soldadoensis	4.48	-2.54
1165	1165.1	1165.05	355.11	Subbotina	-1.73	-2.72
1165	1165.1	1165.05	355.11	Subbotina	-1.26	-3.18
1167	1167.1	1167.05	355.72	Subbotina	-1.69	-3.45
1168.6	1168.7	1168.65	356.2	Subbotina	-1.7	-3.41
1169.1	1169.2	1169.15	356.36	Subbotina	-1.68	-3.51
1173.9	1174	1173.95	357.82	Subbotina	1.5	-1.6
1176.3	1176.4	1176.35	358.55	Subbotina	1.34	-1.74
1177	1177.1	1177.05	358.76	Subbotina	1.3	-2.08
1182.8	1182.9	1182.85	360.53	Subbotina	1.94	-1.45
1183	1183.1	1183.05	360.59	Subbotina	2.16	-2
